# Supplementary material for: Sustainable synthesis of cyclodextrin-based polymers by exploiting natural deep eutectic solvents
Source: Royal Society of Chemistry journal article supplement (doi:10.1039/d0gc02247k), 2020-01-01
Supplement: d0gc02247k1.pdf [file d0gc02247k1.pdf]

## Supporting Information

### Sustainable synthesis of cyclodextrin-based polymers exploiting natural deep eutectic solvents

Claudio Cecone, Gjylije Hoti, Ilona Krabicová, Silvia Lucia Appleton, Fabrizio Caldera, Pierangiola Bracco, Marco Zanetti and Francesco Trotta

#### Polymer Structure

Citric acid was exploited to link together  $\beta$ CD units forming polymer structures while choline chloride to functionalize the product with positive charged pendants in a one-step reaction.

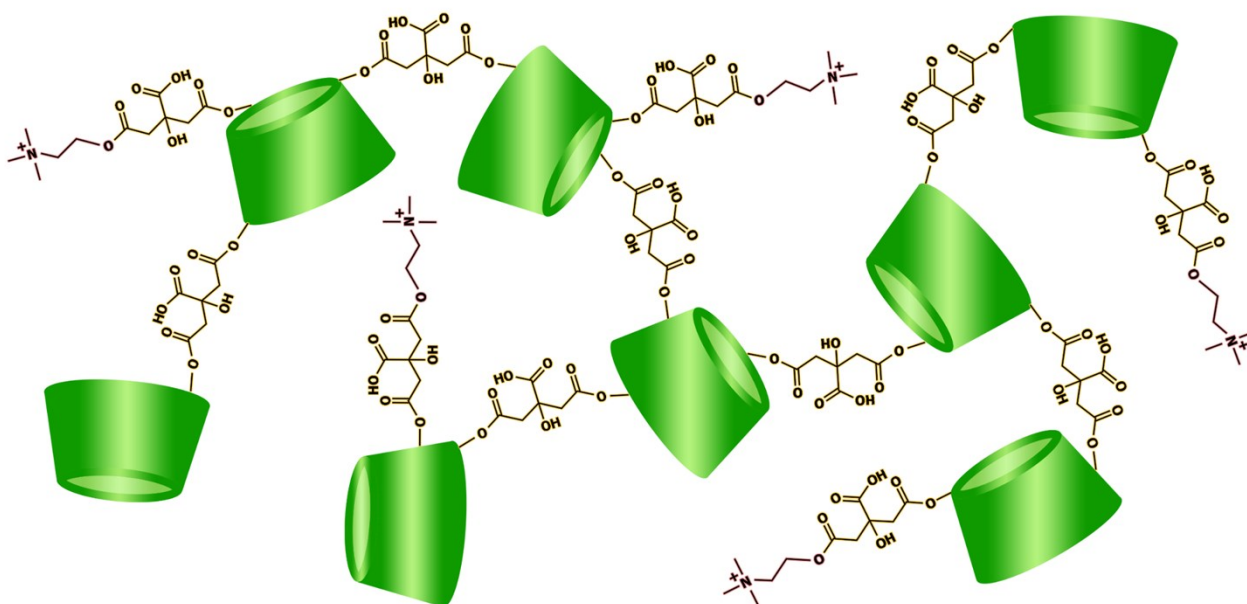

**Figure S1** Schematic representation of the resulting water-soluble polymer.

## Extended histogram map

Results observed in function of CHO:CIT ratio while keeping fixed the temperature, compared with the results in function of temperature while keeping fixed CHO:CIT ratio.

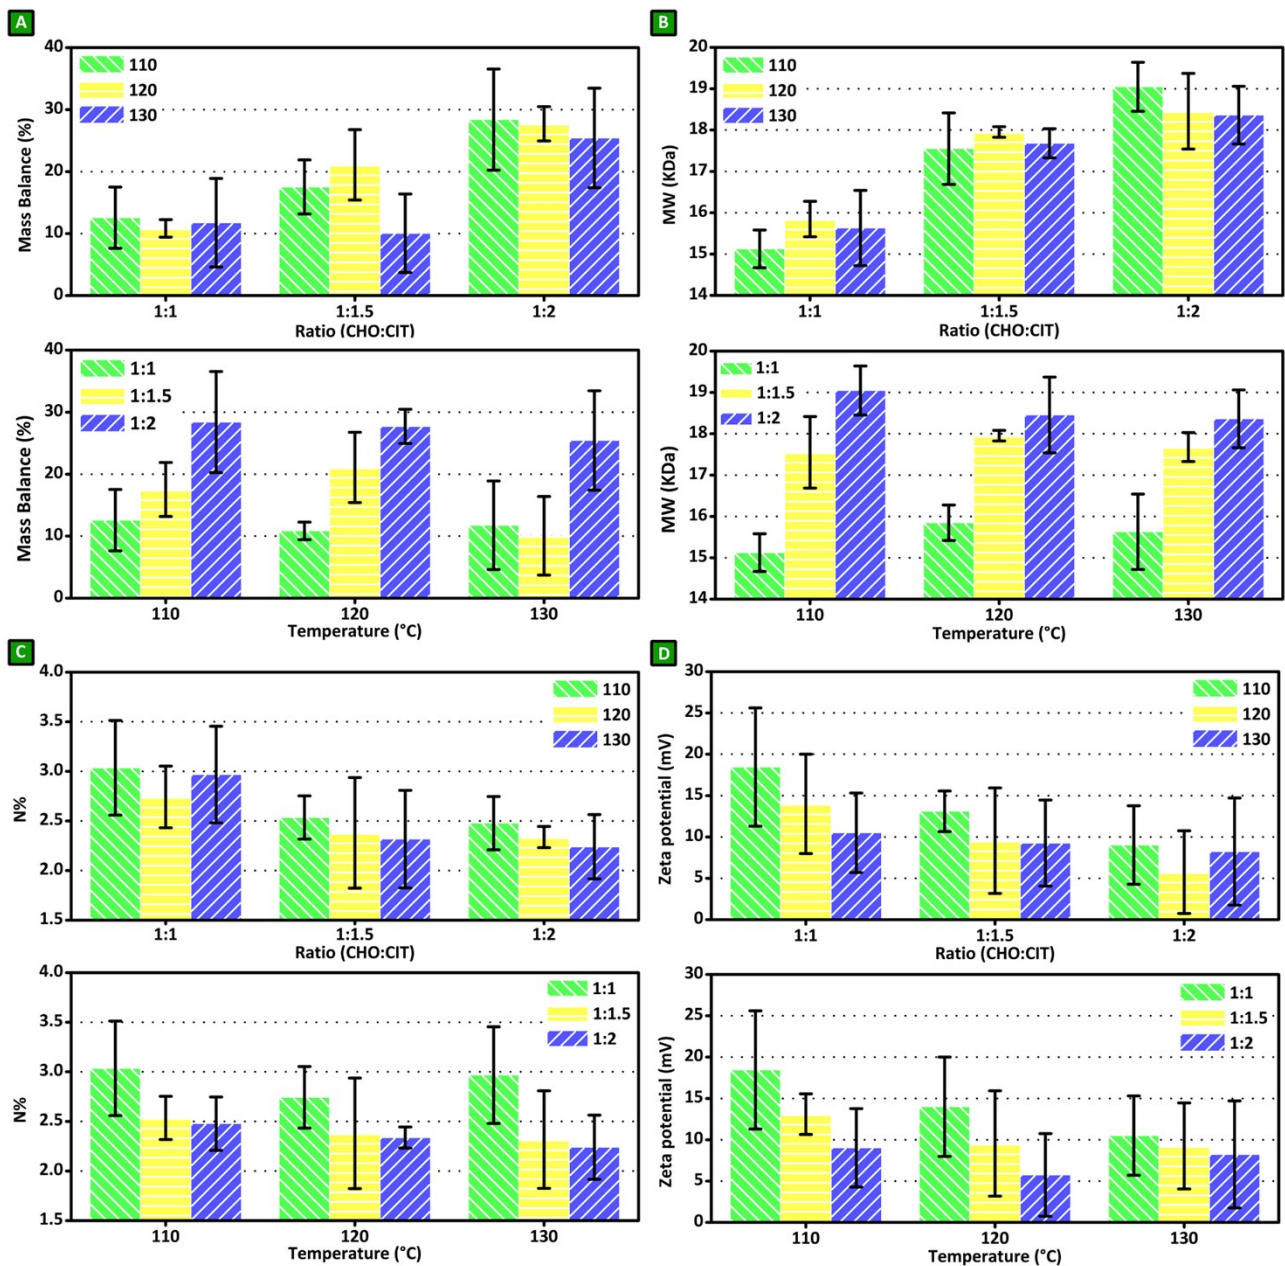

Figure S2 (A) MB, (B) MW, (C) N%, and (D)  $\zeta$ -potential in function of both CHO:CIT ratio and temperature.

### Mass Balance (%)

| T (°C) | CHO:CIT ratio |            |            |
|--------|---------------|------------|------------|
|        | 1:1           | 1:1.5      | 1:2        |
| 110    | 12.6 ± 5.0    | 17.5 ± 4.4 | 28.4 ± 8.2 |
| 120    | 10.9 ± 1.4    | 21.1 ± 5.7 | 27.7 ± 2.8 |
| 130    | 11.8 ± 7.1    | 10.1 ± 6.3 | 25.4 ± 8.0 |

Table S1 MB results from each synthetic condition.

### Molecular Weight (kDa)

| T (°C) | CHO:CIT ratio |            |            |
|--------|---------------|------------|------------|
|        | 1:1           | 1:1.5      | 1:2        |
| 110    | 15.1 ± 0.5    | 17.6 ± 0.9 | 19.0 ± 0.6 |
| 120    | 15.8 ± 0.4    | 18.0 ± 0.1 | 18.5 ± 0.9 |
| 130    | 15.6 ± 0.9    | 17.7 ± 0.4 | 18.4 ± 0.7 |

Table S2 MW results from each synthetic condition.

### Elemental Analysis (wt. %)

| T (°C) | CHO:CIT ratio |           |           |
|--------|---------------|-----------|-----------|
|        | 1:1           | 1:1.5     | 1:2       |
| 110    | 3.0 ± 0.5     | 2.5 ± 0.2 | 2.5 ± 0.3 |
| 120    | 2.7 ± 0.3     | 2.4 ± 0.6 | 2.3 ± 0.1 |
| 130    | 3.0 ± 0.5     | 2.3 ± 0.5 | 2.2 ± 0.3 |

Table S3 N% results from each synthetic condition.

### ζ-potential (mV)

| T (°C) | CHO:CIT ratio |            |           |
|--------|---------------|------------|-----------|
|        | 1:1           | 1:1.5      | 1:2       |
| 110    | 18.5 ± 7.2    | 13.1 ± 2.5 | 9.0 ± 4.7 |
| 120    | 14.0 ± 6.0    | 9.6 ± 6.4  | 5.7 ± 5.0 |
| 130    | 10.5 ± 4.8    | 9.3 ± 5.2  | 8.2 ± 6.5 |

Table S4 ζ-potential results from each synthetic condition.

## SEM supplementary images

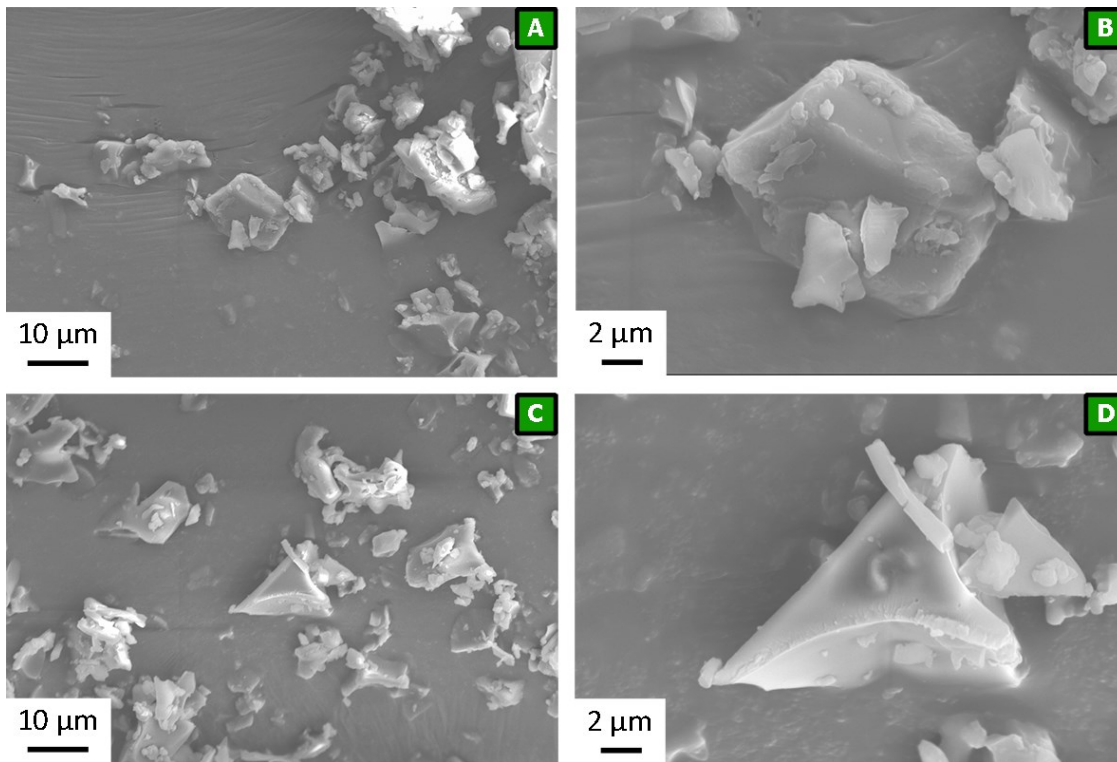

**Figure S3** SEM of different polymer granules after thermal treatment.

## Nanoparticles Deposition

Particles deposition was obtained by using a Buchi Nano Spray Dryer B-90 HP (Flawil, Switzerland). Keeping the piezoelectric spray mesh vibration rate fixed at 122 KHz, 0.1 wt % polymer distilled water solution was used for the process. As reported in Figure S4 the thermal treatment did not alter the morphology obtained after the processing step.

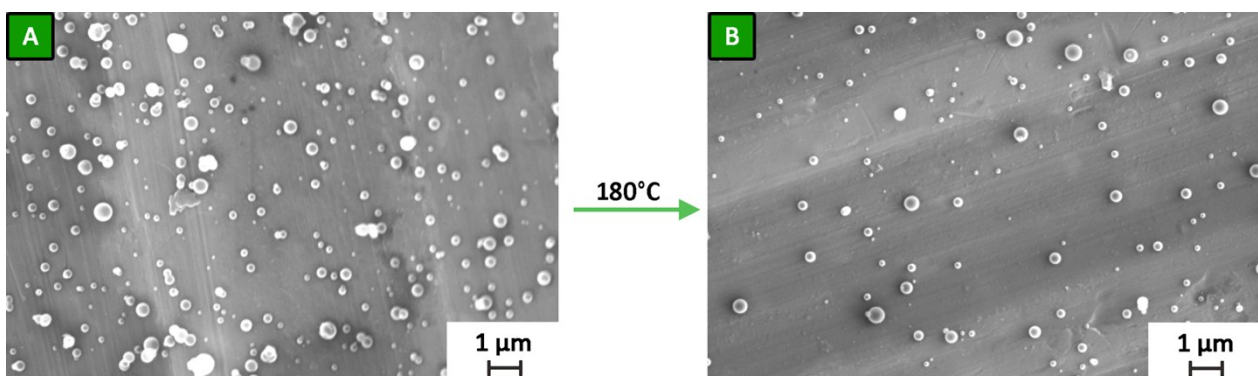

**Figure S4** Nanoparticles obtained via nano spray drying (A) before and (B) after thermal treatment.

## FTIR-ATR extended map

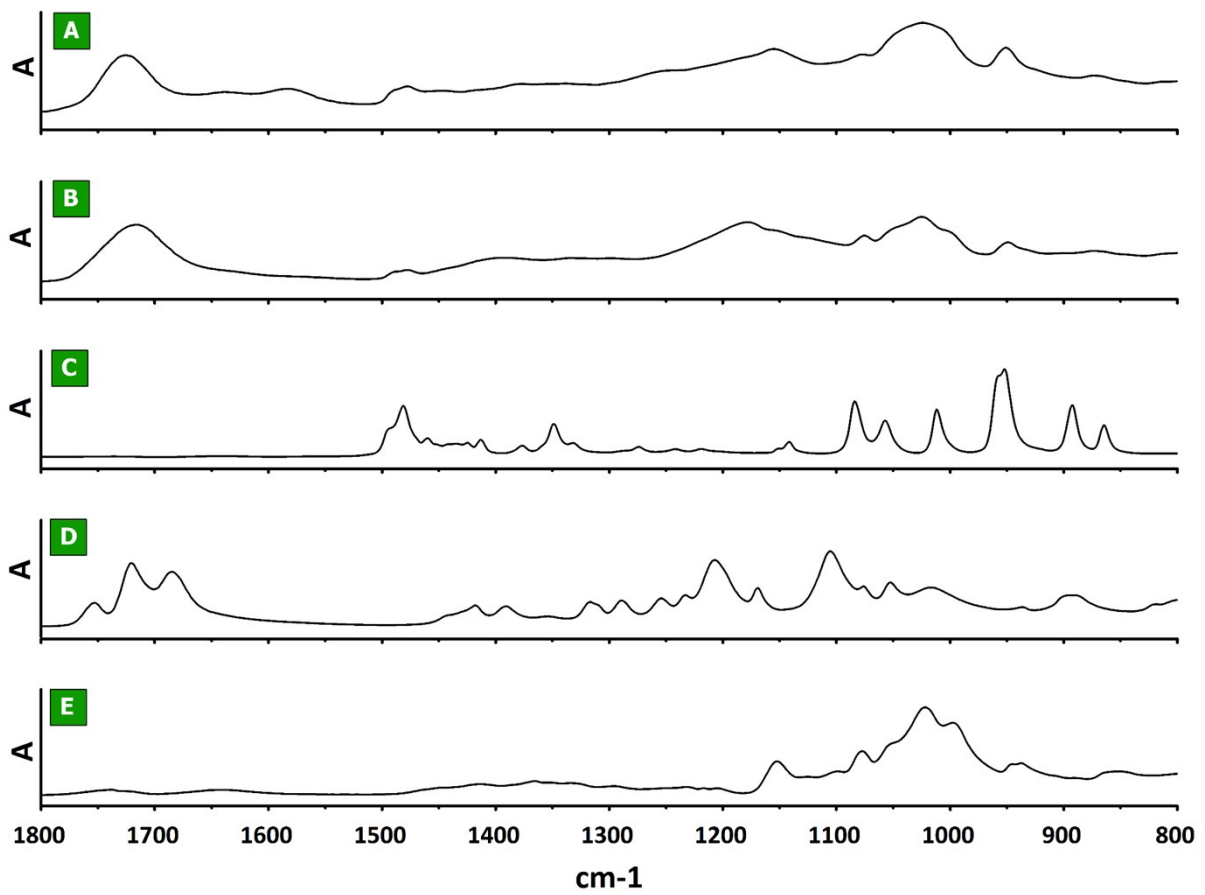

**Figure S5** FTIR-ATR spectra of (A) water-insoluble polymer (post thermal curing), (B) water-soluble polymer, (C) choline chloride, (D) citric acid, and (E)  $\beta$ -cyclodextrin.
